# Supplementary material for: Alpha Helices Are More Robust to Mutations than Beta Strands
Source: PubMed Central journal article supplement (PMC5147804; doi:10.1371/journal.pcbi.1005242), 2016-12-09
Supplement: pcbi.1005242.s005.pdf [file pcbi.1005242.s005.pdf]

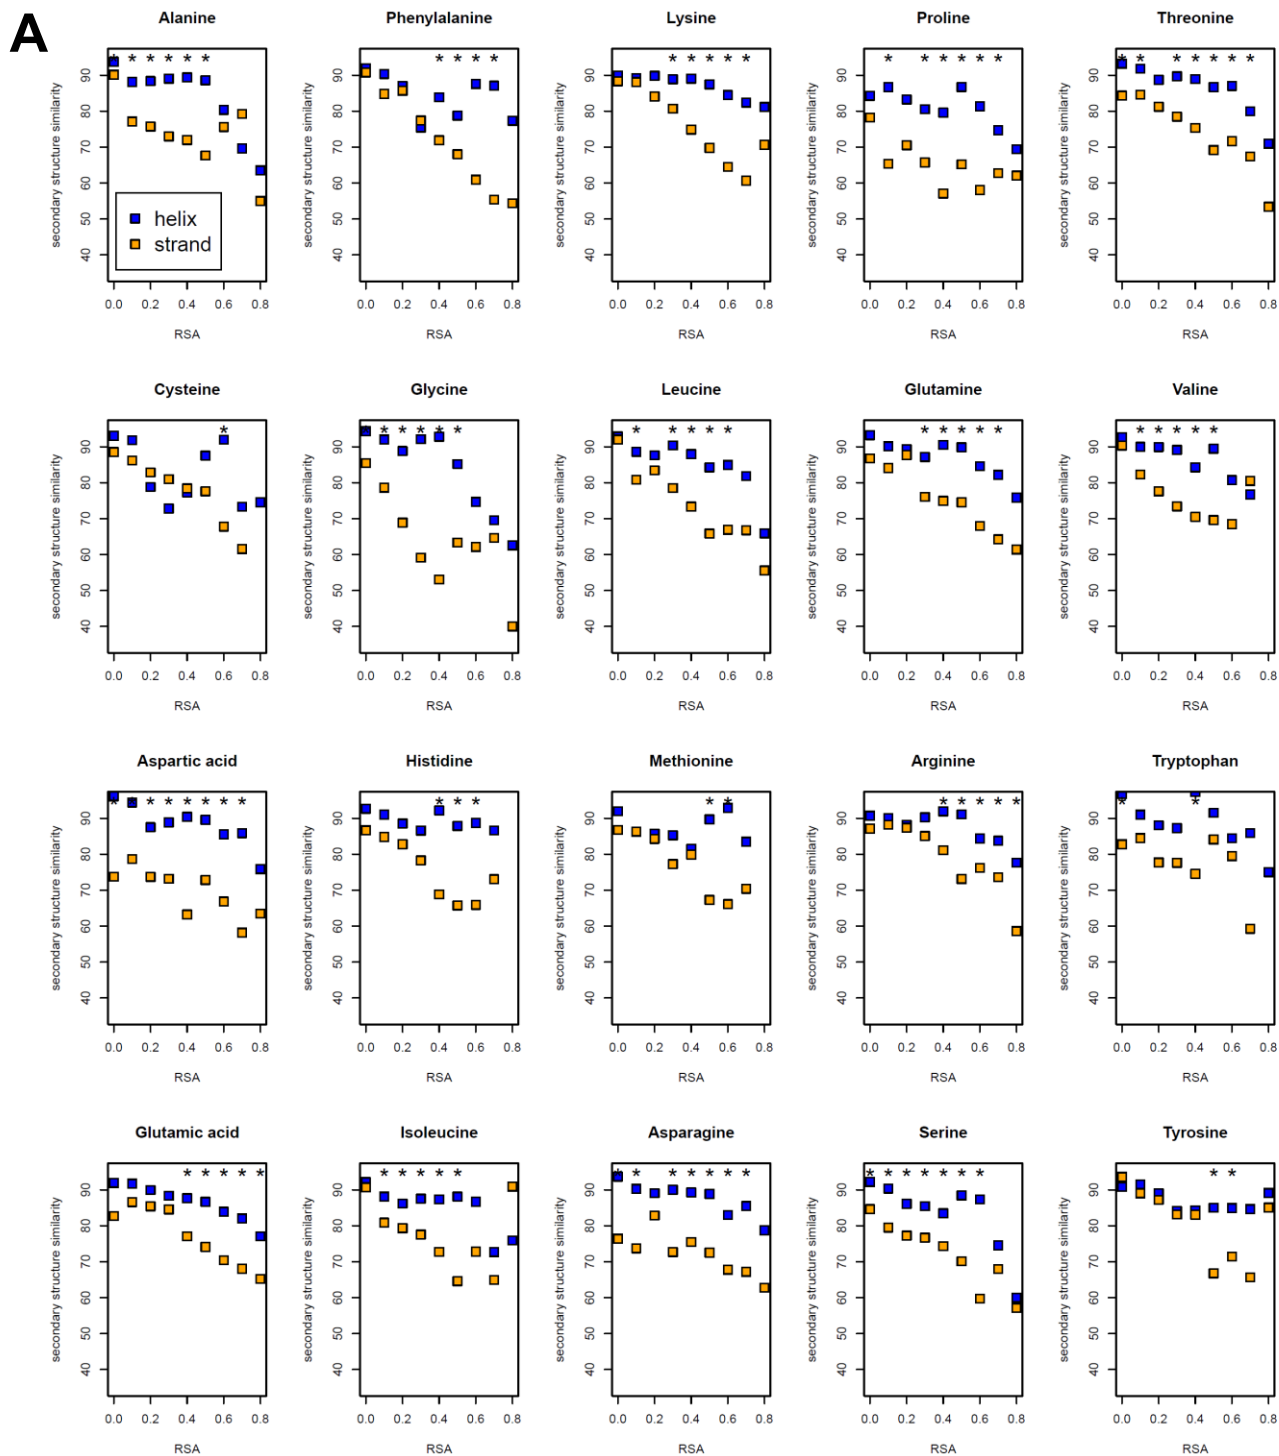

**S5 Figure A) All-alpha vs. all-beta domains.**

**B**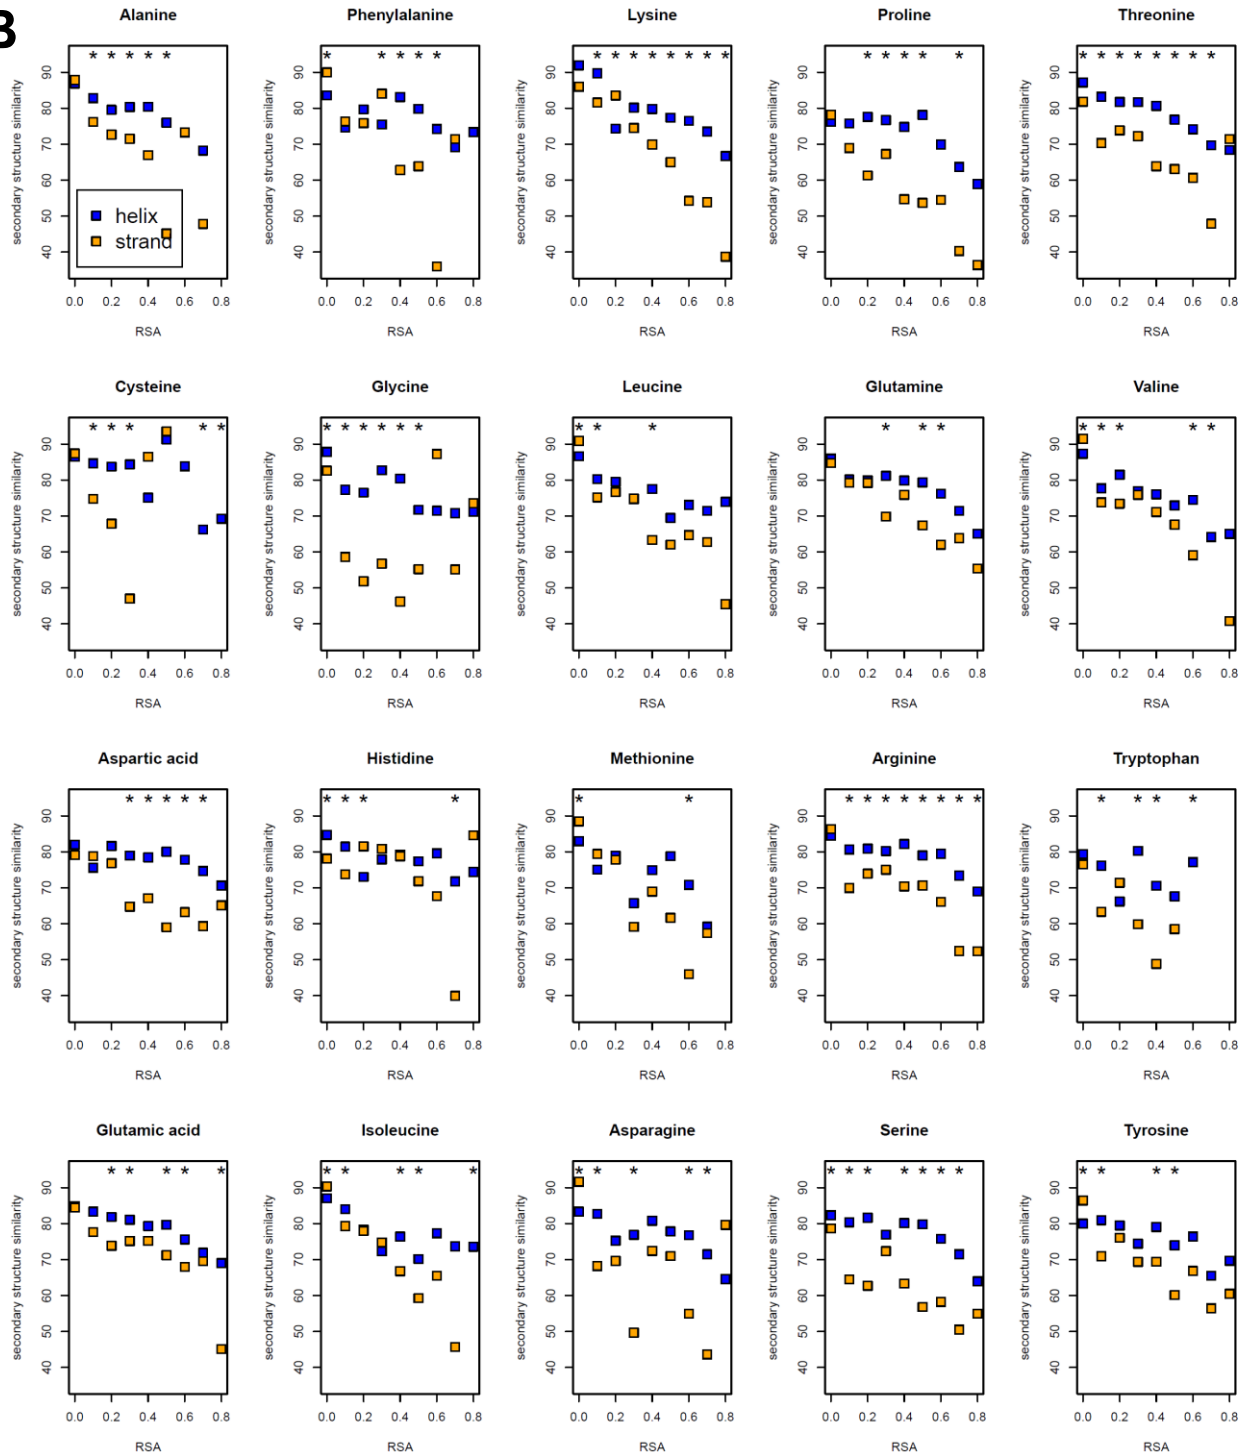**S5 Figure – continued. B)  $\alpha/\beta$  domains.**

**C**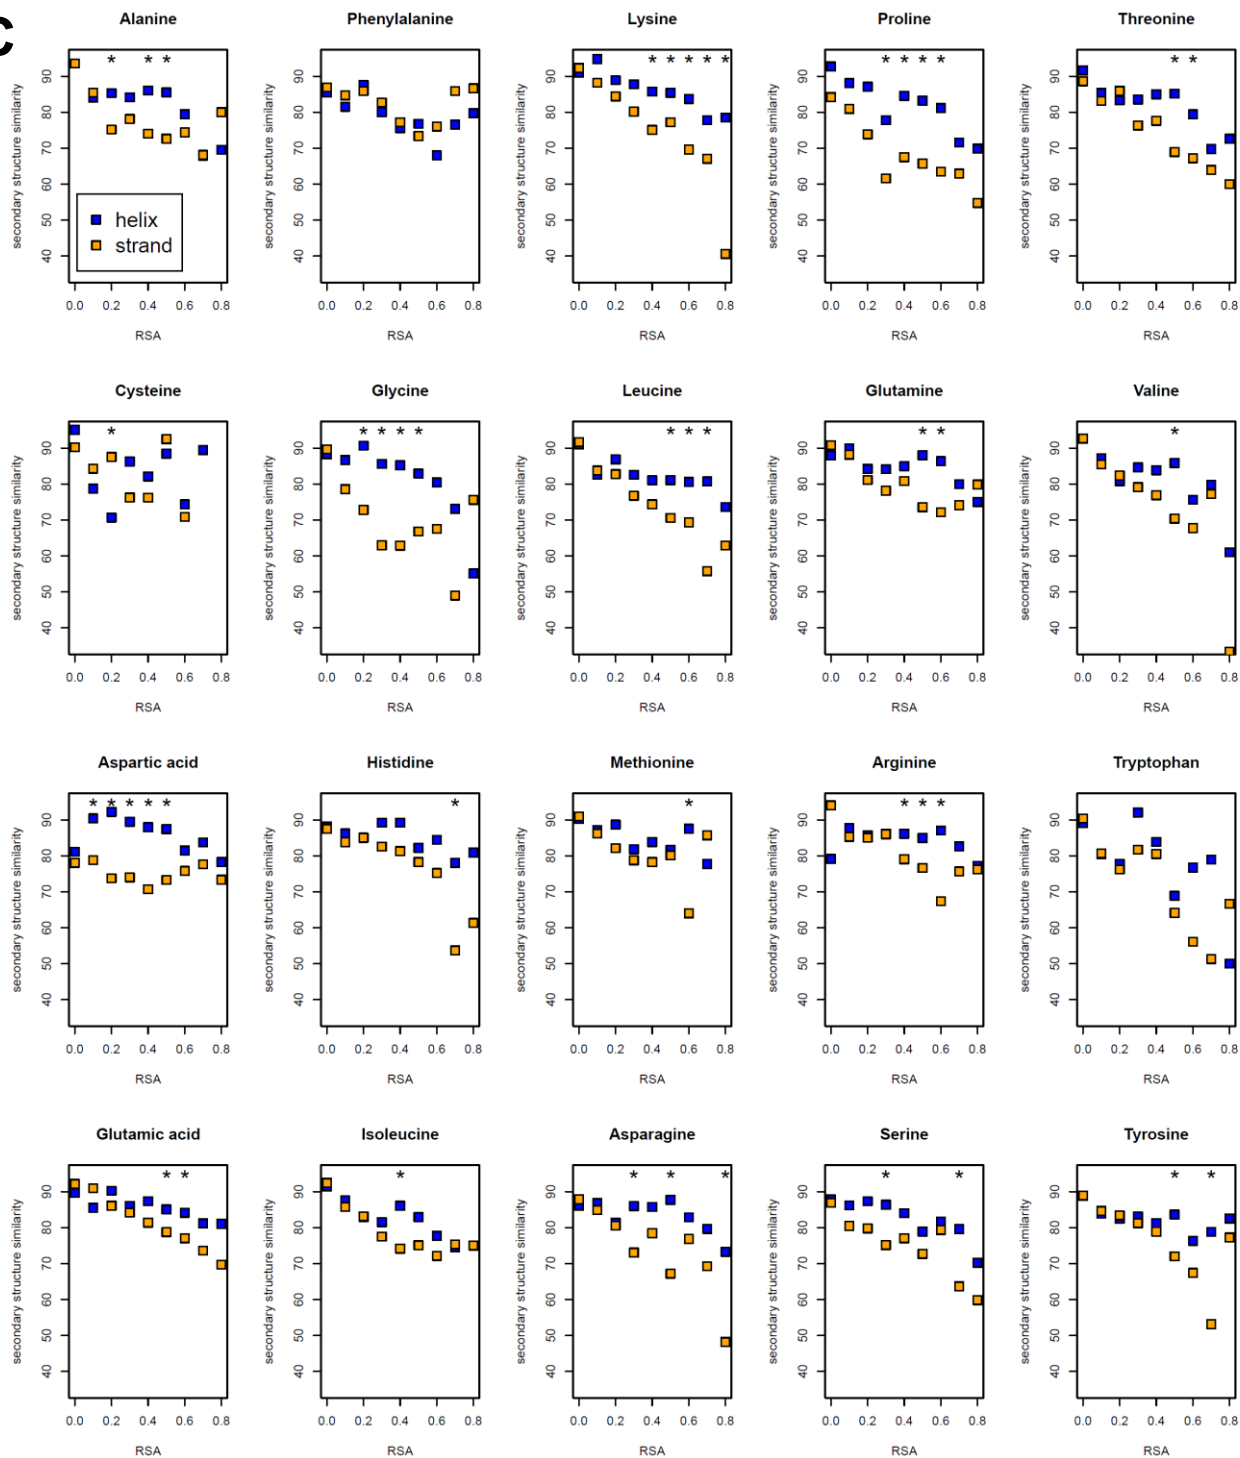**S5 Figure - continued. C)  $\alpha+\beta$  domains.**
